# Supplementary material
Source: Springer Nature journal article supplement (https://www.springermedizin.de/resource/supplementary/12955_2009_672_MOESM1_ESM.pdf/9561050)
Supplement: MOESM1 [file 9561050]

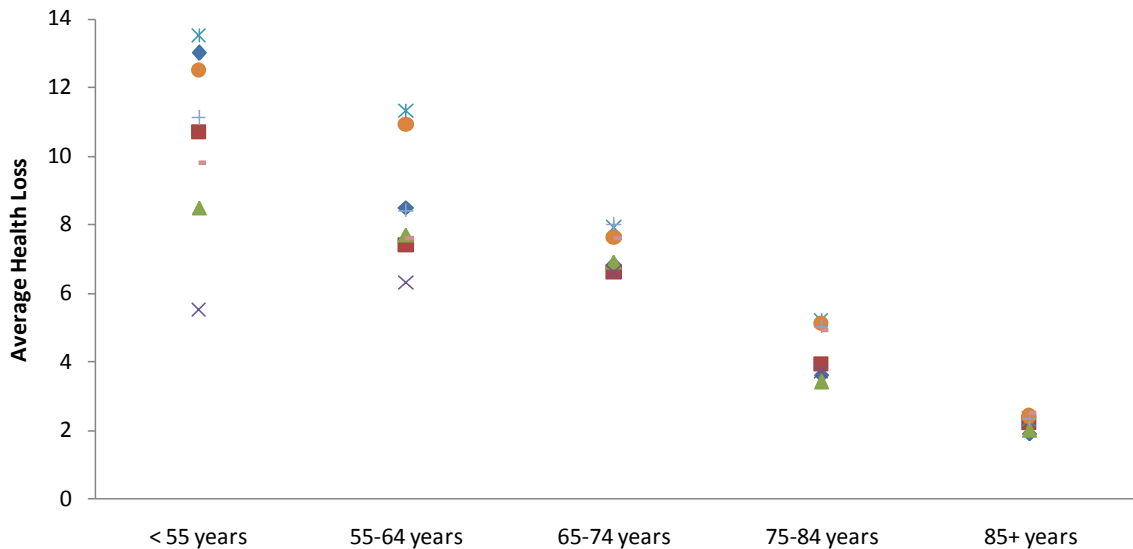

◆ DALYs males ICH

▲ DALYs males ischemic stroke

✧ DALYs females ICH

+ DALYs females ischemic stroke

■ QALYs lost males ICH

✕ QALYs lost males ischemic stroke

● QALYs lost females ICH

- QALYs lost females ischemic stroke
